# Supplementary material for: Self‐administration of injectable contraceptives: a systematic review
Source: PubMed Central journal article supplement (PMC5214286; doi:10.1111/1471-0528.14248), 2016-08-23
Supplement: BJO-124-200-s001.pdf [file BJO-124-200-s001.pdf]

**Table S1. GRADE table**

| Quality assessment                                                                     |                     |                      |               |              |                           |                      | № of patients    |                            | Effect                 |                                                | Certainty of the evidence                                                                      | I<br>m<br>p<br>o<br>r<br>t<br>a<br>n<br>c<br>e |
|----------------------------------------------------------------------------------------|---------------------|----------------------|---------------|--------------|---------------------------|----------------------|------------------|----------------------------|------------------------|------------------------------------------------|------------------------------------------------------------------------------------------------|------------------------------------------------|
| № of studies                                                                           | Study design        | Risk of bias         | Inconsistency | Indirectness | Imprecision               | Other considerations | Women self-admin | Healthcare providers admin | Relative (95% CI)      | Absolute (95% CI)                              |                                                                                                |                                                |
| continuation (non-interrupted use at 12 months) RCT                                    |                     |                      |               |              |                           |                      |                  |                            |                        |                                                |                                                                                                |                                                |
| 1                                                                                      | randomised trial    | not serious          | not serious   | not serious  | very serious <sub>2</sub> | none                 | 28/86 (32.6%)    | 14/46 (30.4%)              | RR 1.07 (0.63 to 1.82) | 21 more per 1000 (from 113 fewer to 250 more)  |  LOW        |                                                |
| continuation (non-interrupted use at 12 months) non-RCT                                |                     |                      |               |              |                           |                      |                  |                            |                        |                                                |                                                                                                |                                                |
| 1                                                                                      | observational study | serious <sub>1</sub> | not serious   | not serious  | very serious <sub>2</sub> | none                 | 51/58 (87.9%)    | 50/64 (78.1%)              | RR 1.13 (0.96 to 1.32) | 102 more per 1000 (from 31 fewer to 250 more)  |  VERY LOW   |                                                |
| continuation (non-interrupted use at 3 months) non-RCT                                 |                     |                      |               |              |                           |                      |                  |                            |                        |                                                |                                                                                                |                                                |
| 1                                                                                      | observational study | serious <sub>1</sub> | not serious   | not serious  | very serious <sub>2</sub> | none                 | 10/10 (100.0%)   | 10/10 (100.0%)             | RR 1 (0.83 to 1.2)     | 0 fewer per 1000 (from 170 fewer to 200 more)  |  VERY LOW   |                                                |
| Safety: serious adverse events                                                         |                     |                      |               |              |                           |                      |                  |                            |                        |                                                |                                                                                                |                                                |
| 0                                                                                      |                     |                      |               |              |                           |                      |                  |                            |                        |                                                |                                                                                                |                                                |
| Safety: other complications                                                            |                     |                      |               |              |                           |                      |                  |                            |                        |                                                |                                                                                                |                                                |
| 1                                                                                      |                     |                      |               |              |                           |                      |                  |                            |                        |                                                |                                                                                                |                                                |
| not estimable                                                                          |                     |                      |               |              |                           |                      |                  |                            |                        |                                                |                                                                                                |                                                |
| not estimable                                                                          |                     |                      |               |              |                           |                      |                  |                            |                        |                                                |                                                                                                |                                                |
| Satisfaction with the contraception method (want to continue this method) at 12 months |                     |                      |               |              |                           |                      |                  |                            |                        |                                                |                                                                                                |                                                |
| 1                                                                                      | observational study | serious <sub>1</sub> | not serious   | not serious  | very serious <sub>2</sub> | none                 | 55/61 (90.2%)    | 50/55 (90.9%)              | RR 0.99 (0.88 to 1.12) | 9 fewer per 1000 (from 109 more to 109 fewer)  |  VERY LOW  |                                                |
| Satisfaction with the contraception method (prefer to continue the method) at 3 months |                     |                      |               |              |                           |                      |                  |                            |                        |                                                |                                                                                                |                                                |
| 1                                                                                      | observational study | serious <sub>1</sub> | not serious   | not serious  | very serious <sub>2</sub> | none                 | 10/10 (100.0%)   | 8/10 (80.0%)               | RR 1.24 (0.87 to 1.75) | 192 more per 1000 (from 600 more to 104 fewer) |  VERY LOW |                                                |
| Satisfaction with the contraception method (recommend to a friend) at 12 months        |                     |                      |               |              |                           |                      |                  |                            |                        |                                                |                                                                                                |                                                |
| 1                                                                                      | observational study | serious <sub>1</sub> | not serious   | not serious  | very serious <sub>2</sub> | none                 | 57/61 (93.4%)    | 53/53 (100.0%)             | RR 0.94 (0.87 to 1.01) | 60 fewer per 1000 (from 130 fewer to 10 more)  |  VERY LOW |                                                |
| Satisfaction with the contraception method (recommend to a friend) at 3 months         |                     |                      |               |              |                           |                      |                  |                            |                        |                                                |                                                                                                |                                                |
| 1                                                                                      | observational study | serious <sub>1</sub> | not serious   | not serious  | very serious <sub>2</sub> | none                 | 9/10 (90.0%)     | 8/10 (80.0%)               | RR 1.13 (0.78 to 1.63) | 104 more per 1000 (from 176 fewer to 504 more) |  VERY LOW |                                                |
| Satisfaction in location (at 3 months)                                                 |                     |                      |               |              |                           |                      |                  |                            |                        |                                                |                                                                                                |                                                |
| 1                                                                                      | observational study | serious <sub>1</sub> | not serious   | not serious  | very serious <sub>2</sub> | none                 | 9/10 (90.0%)     | 9/10 (90.0%)               | RR 1 (0.75 to 1.34)    | 0 fewer per 1000 (from 225 fewer to 306 more)  |  VERY LOW |                                                |

MD – mean difference, RR – relative risk  
 1. High risk of bias in included study  
 2. One study only with few participants

**High certainty evidence:** Further research is very unlikely to change our certainty of the estimate of effect. **Moderate certainty evidence:** Further research is likely to have an important impact on the certainty of the estimate of effect and may change the estimate. **Low certainty evidence:** Further research is very likely to have an important impact on the certainty of the estimate of effect and is likely to change the estimate or any estimate of effect is very uncertain. **Very low certainty evidence:** Any estimate of effect is very uncertain
